# Supplementary material for: Insomnia Impairs Both the Pro-BDNF and the BDNF Levels Similarly to Older Adults with Cognitive Decline: An Exploratory Study
Source: MDPI journal article supplement (doi:10.3390/ijms24087387), 2023-04-17
Supplement: s1 [file s1]

**Supplementary material Figure 1S:** Uncropped immunoblots of pro-BDNF and Transferrin corresponding to the representative images showed in Figure 1 in the main manuscript. Figure 1S and 2S correspond to the samples of Group 1) No insomnia/no cognitive decline (control group); Figures 3S and 4S correspond to samples of Group 2 (Insomnia-alone); Figures 5S and 6S correspond to samples of Group 3 (Cognitive decline alone), and Figure 7S and 8S correspond to Group 4 (Insomnia and cognitive decline).

| Figure                                                                              | Description                                                                          |
|-------------------------------------------------------------------------------------|--------------------------------------------------------------------------------------|
| 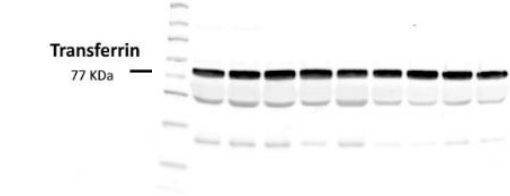   | <p><b>Figure 1S.</b> Transferrin immunoblot representative of Group 1 (Control).</p> |
|   | <p><b>Figure 2S.</b> Pro-BDNF immunoblot representative of Group 1.</p>              |
|  | <p><b>Figure 3S.</b> Transferrin immunoblot representative Group 2 (Insomnia).</p>   |

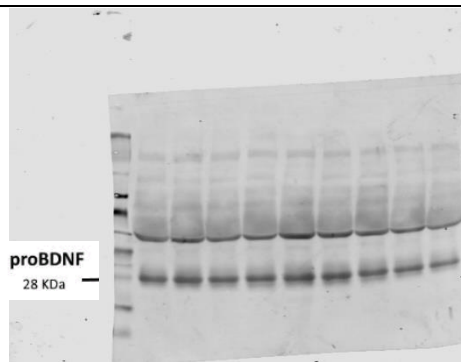

**Figure 4S.** Pro-BDNF immunoblot representative Group 2.

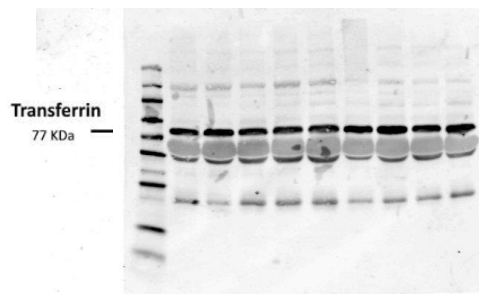

**Figure 5S.** Transferrin immunoblot representative of Group 3 (Cognitive decline).

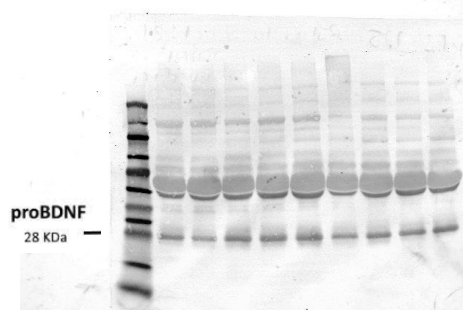

**Figure 6S.** Pro-BDNF immunoblot Representative of Group 3.

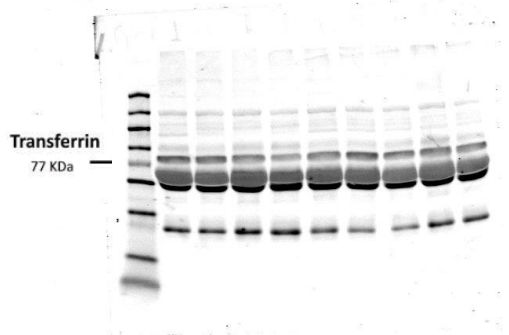

**Figure 7S.** Transferrin immunoblot representative of Group 4 (Insomnia and Cognitive decline).

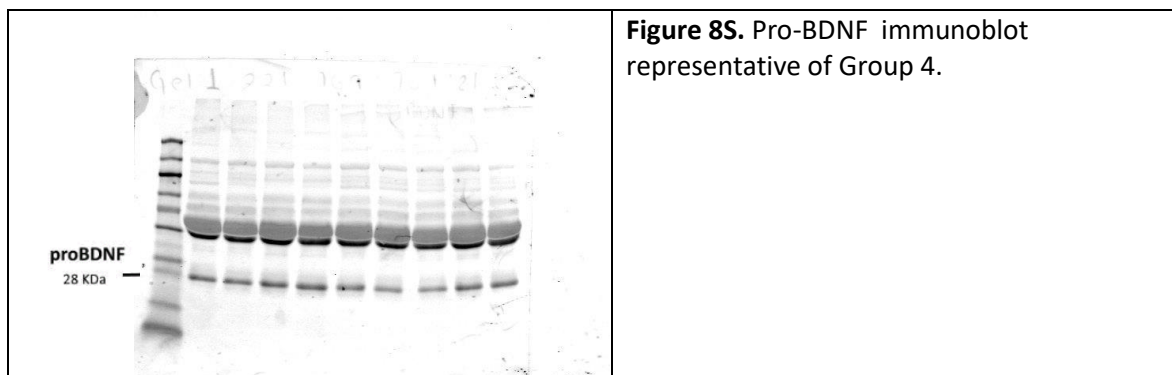

**Figure 8S.** Pro-BDNF immunoblot representative of Group 4.

**Table 1S: Adjusted linear regression model for the association between variables separately considering insomnia and cognitive decline on BDNF concentration in serum excluding individuals that consume antidepressants.**

| BDNF (pg/mL)                     | $\beta$   | S.E.     | Z     | p-value | 95% CI             |
|----------------------------------|-----------|----------|-------|---------|--------------------|
| Group 2                          | -3925.26  | 1035.84  | -3.79 | 0.000   | -5955.48, -1895.05 |
| Group 3                          | -1468.688 | 953.6808 | -1.54 | 0.124   | -3337.86, 400.49   |
| Group 4                          | -2830.757 | 1125.707 | -2.51 | 0.012   | -5037.10, -624.41  |
| Anxiety                          | 123.2299  | 126.1338 | 0.98  | 0.329   | -123.98, 370.44    |
| Depression                       | 32.77716  | 25.20955 | 1.30  | 0.194   | 16.63, 82.18       |
| Sex (female)                     | -912.6268 | 809.3134 | -1.13 | 0.259   | -2498.85, 673.59   |
| Age                              | -49.63    | 57.97761 | -0.86 | 0.392   | -163.26, 63.99     |
| Education (years)                |           |          |       |         |                    |
| <6                               | -1150.4   | 2503.48  | -0.46 | 0.646   | -6057.17, 3756.28  |
| From 6 to 9                      | 380.267   | 2442.991 | 0.16  | 0.876   | -4407.90, 5168.44  |
| From 10 to 11                    | -1041.0   | 2524.05  | 0.41  | 0.680   | -5988.095, 3906.0  |
| 12 and more                      | 186.22    | 2447.22  | 0.08  | 0.939   | -4610.25, 4982.70  |
| Living arrangement (accompanied) | 6.86      | 1426.48  | 0.00  | 0.996   | 2788.984, 2802.71  |
| Multimorbidity                   | -760.3275 | 996.7911 | -0.76 | 0.446   | 2714.002, 1193.34  |
| Number of Medications            | 161.0125  | 121.5344 | 1.32  | 0.185   | 77.19, 399.21      |
| Anti-depressants intake          |           |          |       | omitted |                    |
| Current smoking                  | -920.7924 | 1167.654 | -0.79 | 0.430   | 3209.351, 367.76   |
| Current alcohol consumption      | 469.0985  | 941.2218 | 0.50  | 0.618   | 1375.66, 2313.85   |
| Frailty                          |           |          |       |         |                    |
| Pre-Frail                        | 1570.69   | 840.4509 | 1.87  | 0.062   | 76.56317, 3217.94  |
| Frail                            | 2616.327  | 1121.223 | 2.33  | 0.020   | 418.7693, 4813.88  |

Group 1 (control)= non-insomnia and or non-cognitive decline, Group 2= Only in-somnia, Group 3= Only cognitive decline, Group 4= Both insomnia and cognitive decline.
